# Supplementary material
Source: ML conference proceedings conference paper supplement (https://openreview.net/forum?id=5d4UTqXjmS)

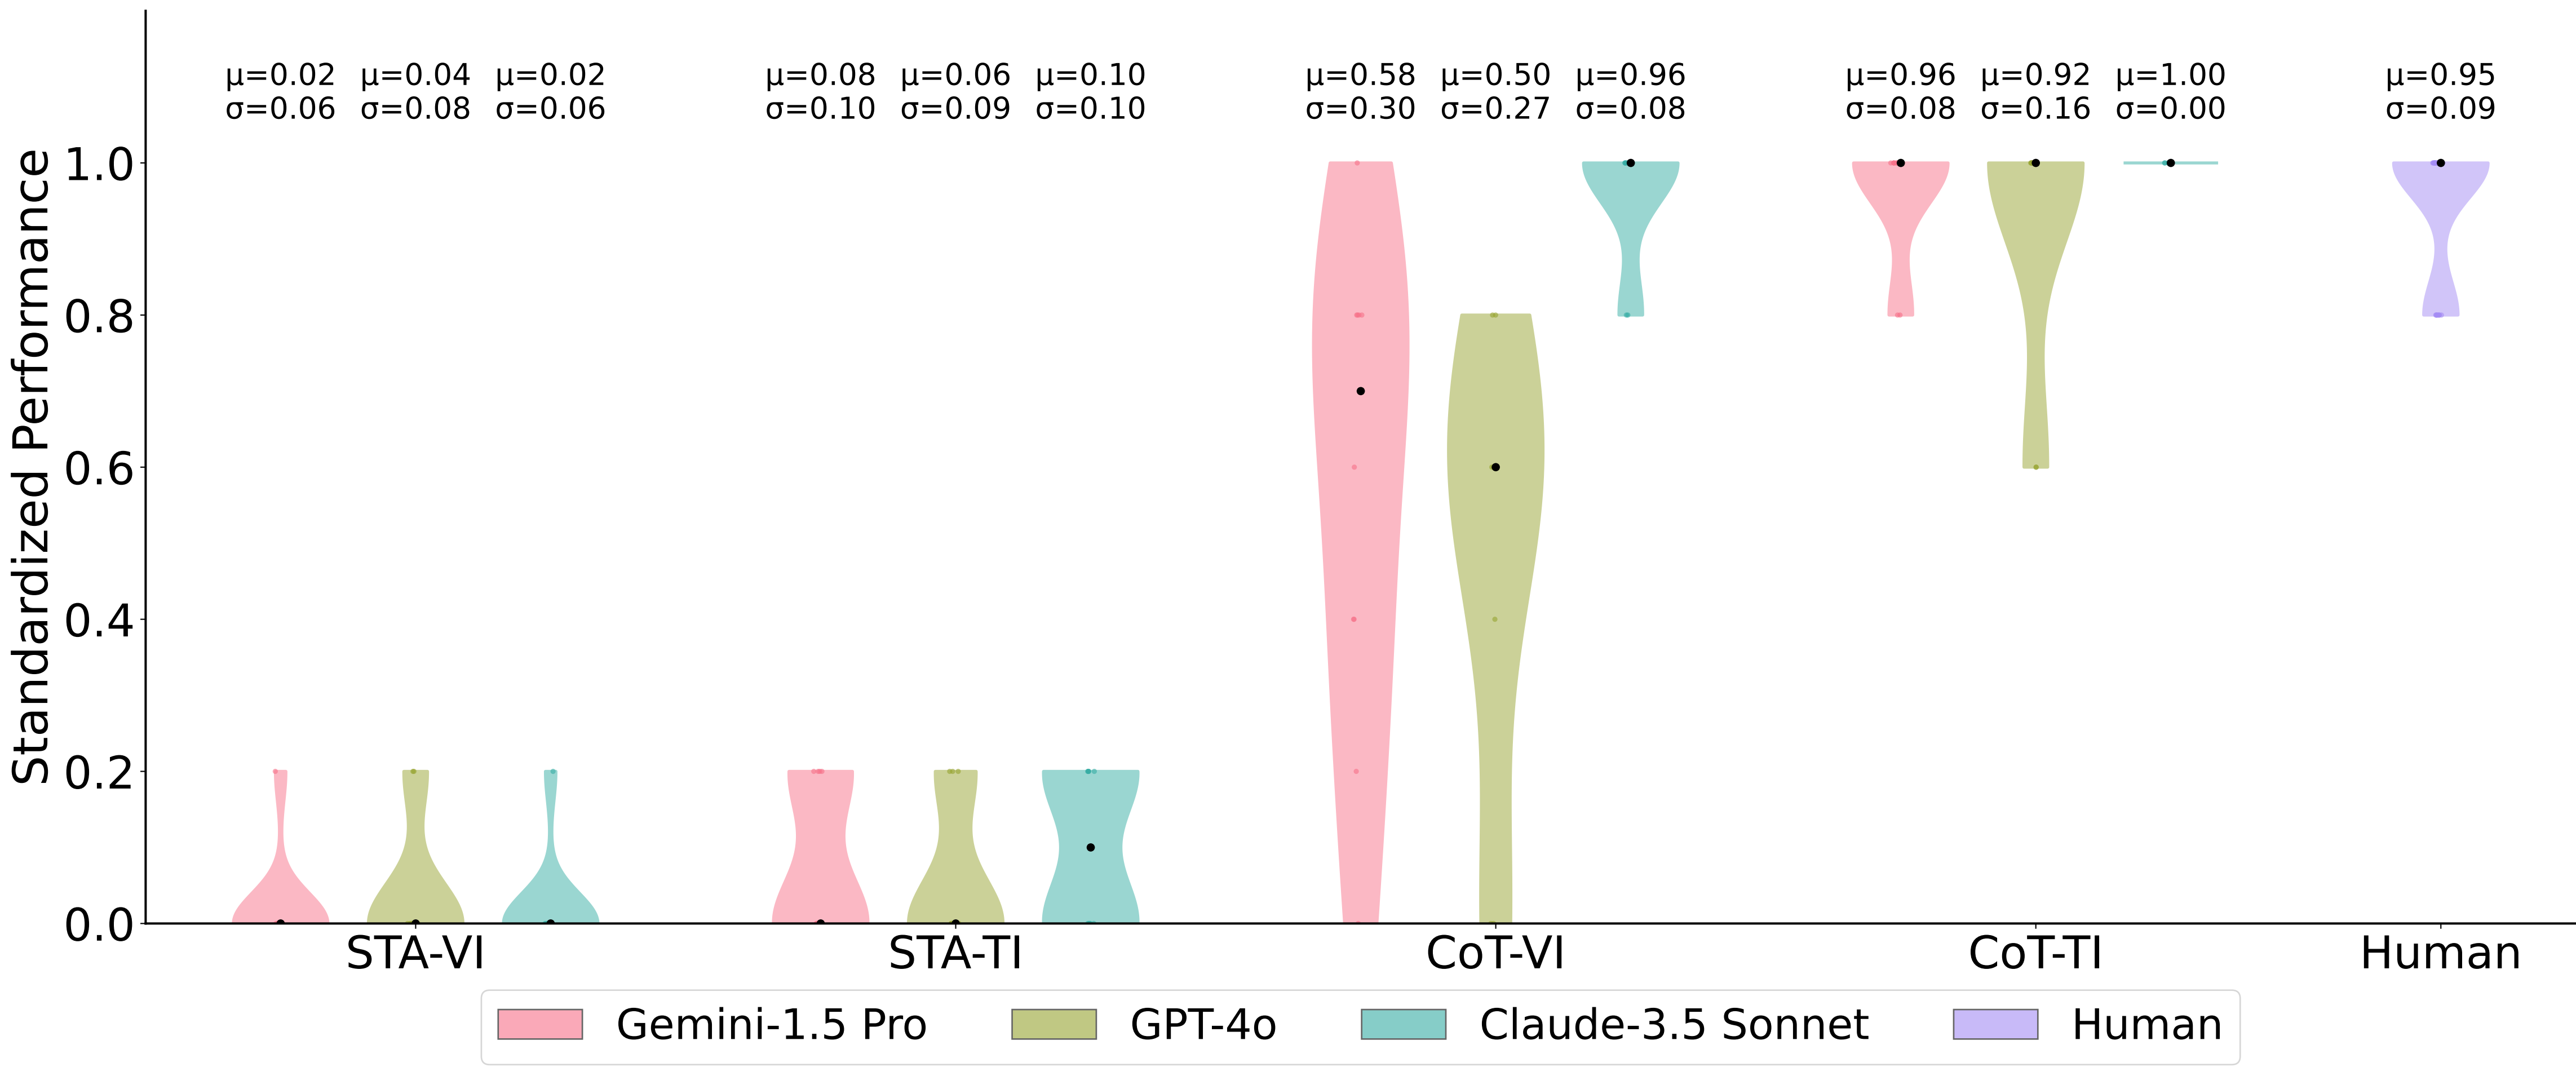

Supplement: supplementary_material [file attachment]

## WCST

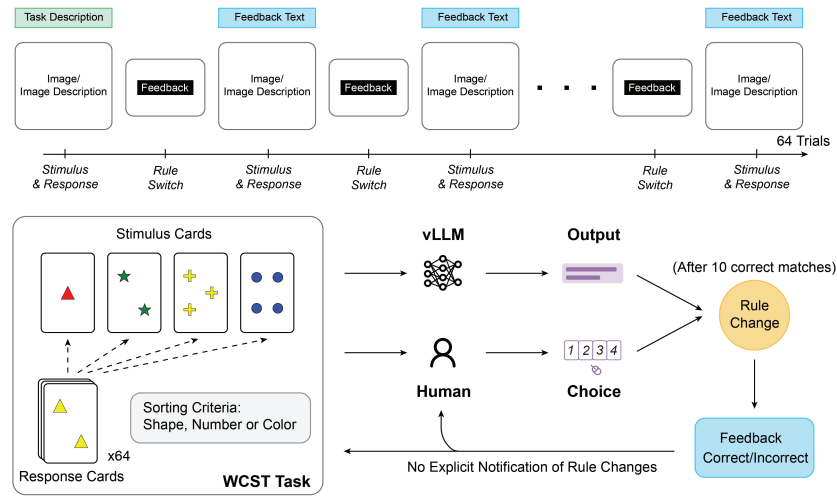

## Stroop

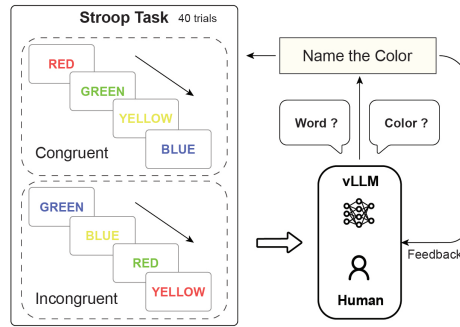

## n-back

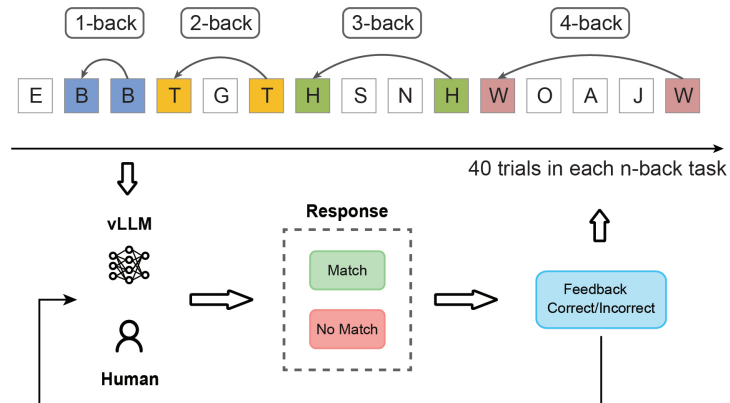

## Tower of London

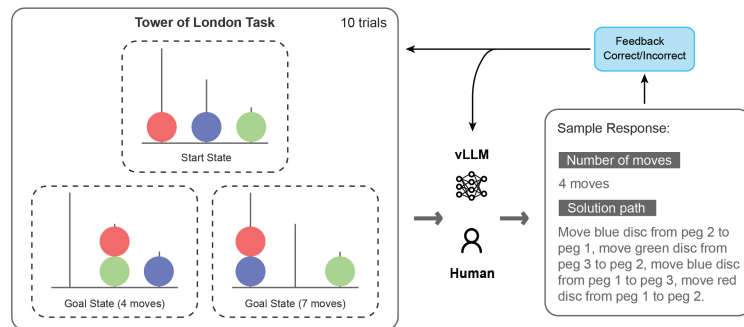

## Iowa gambling

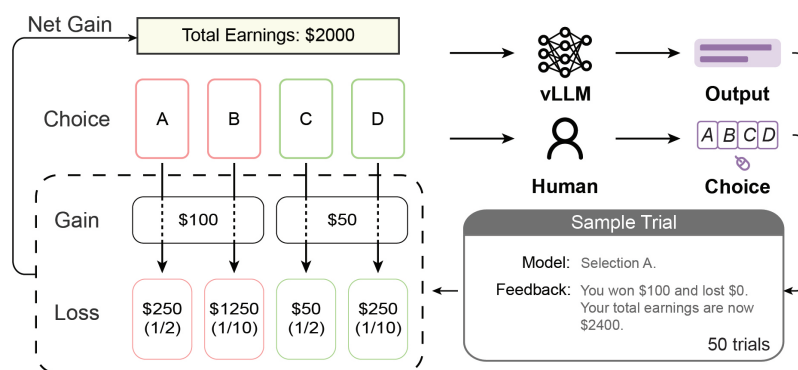

Supplement: supplementary_material [file attachment]
